# Supplementary material
Source: PubMed Central journal article supplement (PMC4291370)
Supplement: AAC.03061-14_zac001153594so1.pdf [file AAC.03061-14_zac001153594so1.pdf]

Table S1. Primers used in this study

| Target or purpose        | Primer name | Sequence (5'-3')                    | Product size (bp) | Reference  |
|--------------------------|-------------|-------------------------------------|-------------------|------------|
| <i>bla<sub>KPC</sub></i> | KPC-FOR     | 5'-TGTCACTGTATCGCCGTC-3'            | 1011              | S1         |
|                          | KPC-REV     | 5'-CTCAGTGCTCTACAGAAAACC-3'         |                   |            |
| P11 relaxase gene        | P11-f       | 5'-CGTGCGAAGGGCGACAARACBTAYCA-3'    | 180               | S2         |
|                          | P1-r        | 5'-AGCGATGTGGATGTGAAGGTTTRTCNGTR-3' |                   |            |
| P11 relaxase gene        | P11-relax F | 5'-GCTTACTATGTCCTCGTTTCG-3'         | 584               | This study |
|                          | P11-relax R | 5'-ACACCGTTATGGAGACAAAC-3'          |                   |            |
| <i>Tn1721</i>            | Tn1721-1F   | 5'-ACCTTTGATGGTGGCGTAAG-3'          | 352               | This study |
|                          | Tn1721-1R   | 5'-GGGAGCACATCAACCTAACC-3'          |                   |            |
|                          | Tn1721-2F   | 5'-GTCGGAGTCGTTGAAGGTGT-3'          | 447               | This study |
|                          | Tn1721-2R   | 5'-CGCTTGGTACAGAAGCTGACT-3'         |                   |            |
|                          | Tn1721-3F   | 5'-ACCACCACTGTATCGCCTTC-3'          | 2243              | This study |
|                          | Tn1721-3R   | 5'-GCCCTTTCATTTGCTGGTAA-3'          |                   |            |
|                          | Tn1721-4F   | 5'-ATTGCTTATGGTGCCTGGTC-3'          | 1474              | This study |
|                          | Tn1721-4R   | 5'-TATGGCACGGCAAATGACTA-3'          |                   |            |
|                          | Tn1721-5F   | 5'-CGAGTTTAGCGAATGGTTCC-3'          | 592               | This study |
|                          | Tn1721-5R   | 5'-TATCAGCGACATCGTCAACC-3'          |                   |            |

|           |                             |      |            |
|-----------|-----------------------------|------|------------|
| Tn1721-6F | 5'-CATGCGACTTGTCTTCAGGA-3'  |      | This study |
| Tn1721-6R | 5'-GTACCGTGGACAGGAACGTC-3'  |      |            |
| Tn1721-7F | 5'-TCCTCCACCTTCATCCTCAG-3'  | 413  | This study |
| Tn1721-7R | 5'-ATATCACGAATCCCGAGCTG-3'  |      |            |
| Tn1721-8F | 5'-GGTGAAACACTGAATGATGAA-3' | 1802 | This study |
| Tn1721-8R | 5'-GTTTGATGATGTGACTGGAGA-3' |      |            |

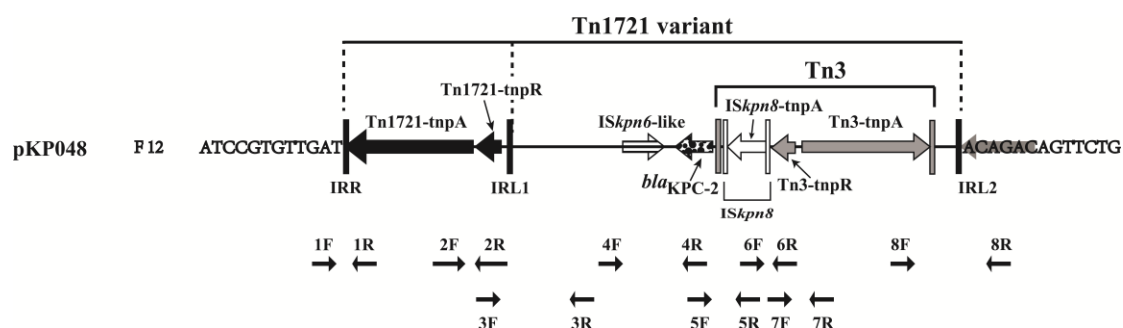

Figure S1. Primers used in this study.

#### Reference

- S1. Woodford N, Tierno PM Jr, Young K, Tysall L, Palepou MF, Ward E, Painter RE, Suber DF, Shungu D, Silver LL, Inglima K, Kornblum J, Livermore DM. 2004. Outbreak of *Klebsiella pneumoniae* producing a new carbapenem-hydrolyzing class A  $\beta$ -lactamase, KPC-3, in a New York Medical Center. *Antimicrob. Agents Chemother.* 48:4793–4799.
- S2. Alvarado A, Garcillán-Barcia MP, de la Cruz F. A degenerate primer MOB typing (DPMT) method to classify gamma-proteobacterial plasmids in clinical and environmental settings. *PLoS One* 2012; 7: e40438.
